# Supplementary material for: The water channel aquaporin-1a1 facilitates movement of CO2 and ammonia in zebrafish (Danio rerio) larvae
Source: Oxford University Press journal article supplement (doi:10.1242/jeb.129759), 2015-12-01
Supplement: jeb129759supp.pdf [file jeb129759supp.pdf]

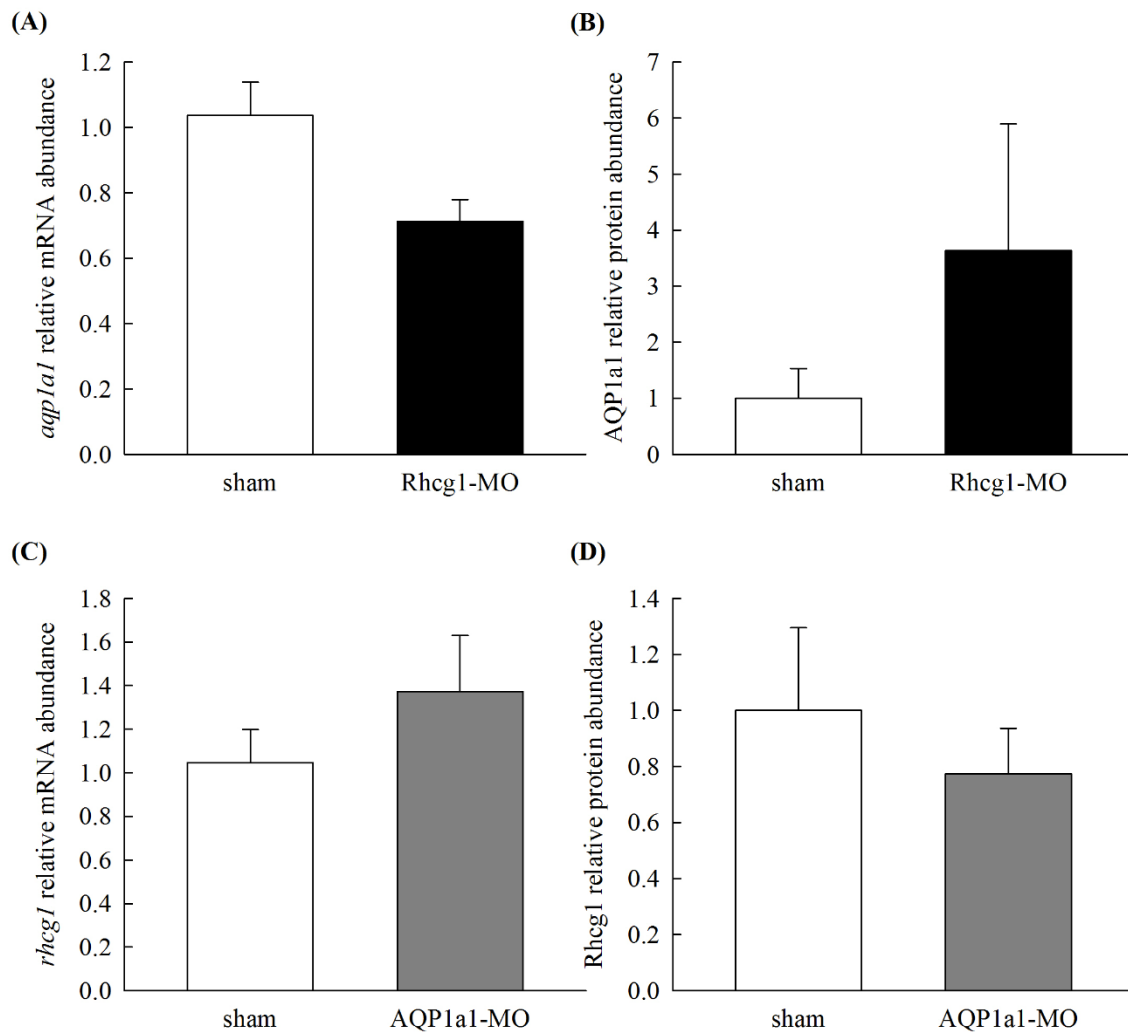

**Fig. S1.** Relative (A) mRNA and (B) protein abundances of AQP1a1 in 4 dpf zebrafish (*Danio rerio*) sham or Rhcg1 morphant (Rhcg1-MO) larvae, together with relative (C) mRNA and (D) protein abundances of Rhcg1 in sham or AQP1a1 morphant (AQP1a1-MO) larvae (*Series III*). Values are means + SEM,  $N = 4-7$ . Values were normalized relative to 18S (for mRNA) or  $\beta$ -actin (for protein), and values for morphant larvae then were expressed relative to those of the corresponding sham group. No significant effects of Rhcg1 (panels A, B) or AQP1a1 (panels C, D) knockdown were detected (one-sample Student's  $t$ -tests,  $P > 0.05$  for all).
